# Supplementary material
Source: publisher figshare collection journal article supplement (https://rs.figshare.com/ndownloader/files/39632388)
Supplement: Supplementary file 1 [file 39632388]

Photoelectrochemical Performance of BiOI/TiO2 Nanotube Arrays (TNAS) p-n Heterojunction synthesized by SILAR-Ultrasonication-Assisted Methods

Sherly Kasuma Warda Ningsiha,b, Rahmat Wibowoa, Jarnuzi Gunlazuardia*

aDepartment of Chemistry, Faculty of Mathematics and Natural Sciences (FMIPA), Universitas Indonesia, Depok, 16424, Indonesia

bDepartment of Chemistry, Faculty of Mathematics and Natural Sciences (FMIPA), Universitas Negeri Padang, Kampus Air tawar, Padang 25130, Indonesia

[*jarnuzi@ui.ac.id](mailto:*jarnuzi@ui.ac.id)

†Department of Chemistry, Faculty of Mathematics and Natural Sciences (FMIPA), Universitas Indonesia, Depok, 16424, Indonesia


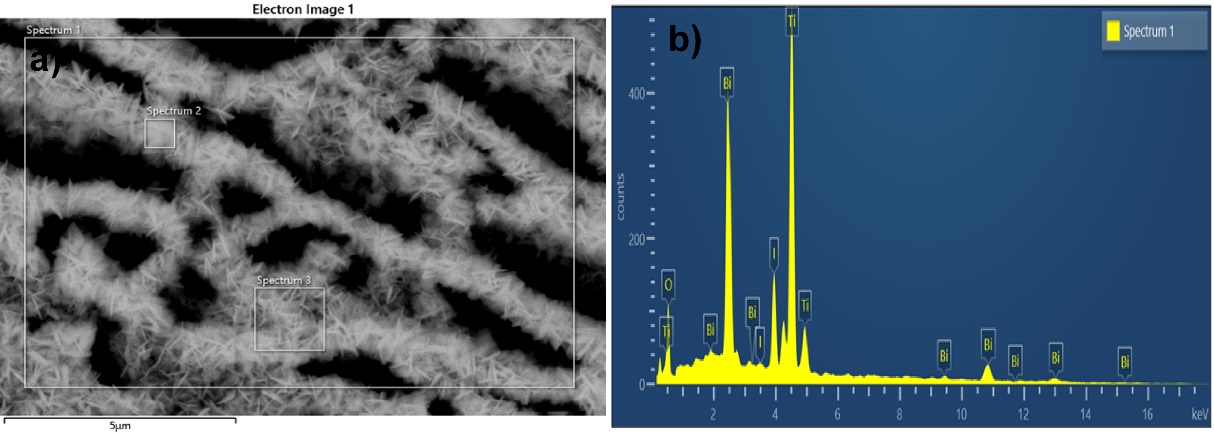


Figure S1. a) Electron image and b) EDX spectrum of BiOI/TNAs prepared with 7 mM of cationic and anionic precursors

Table S1. Composition of BiOI/TNAs prepared with 7 mM of cationic and anionic precursors

| **Element** | **Line Type** | **Weight %** | **Weight % Sigma** | **Atomic %** |
| --- | --- | --- | --- | --- |
| O | K series | 14.81 | 1.18 | 48.45 |
| Ti | K series | 32.18 | 0.77 | 35.16 |
| I | L series | 19.24 | 0.69 | 7.93 |
| Bi | M series | 33.77 | 0.99 | 8.46 |
| Total |  | 100.00 |  | 100.00 |


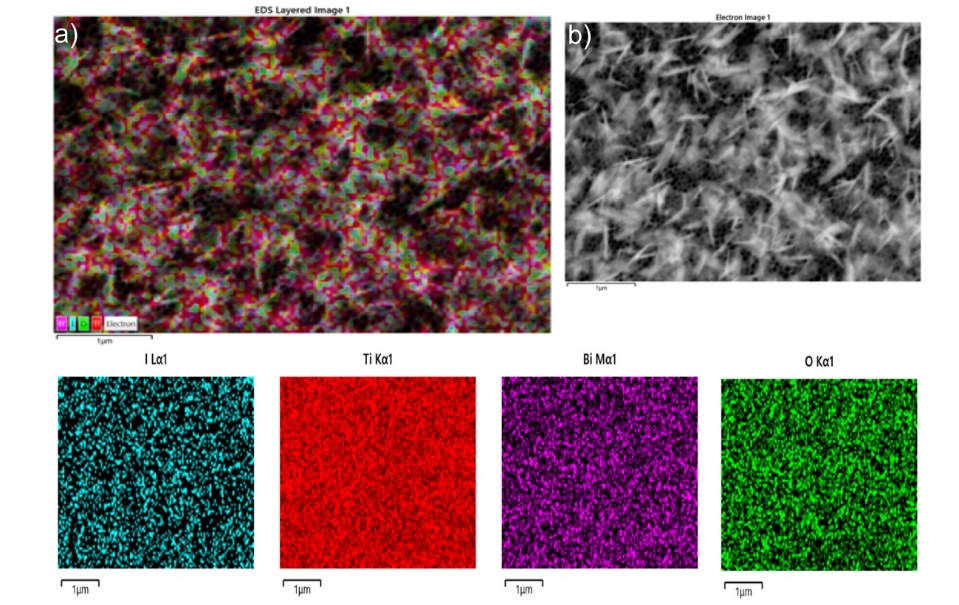


Figure S2. EDX mapping of BiOI/TNA prepared with 5 mM of cationic precursor and 3mM of anionic precursor a) EDX layer image and b) Electron image


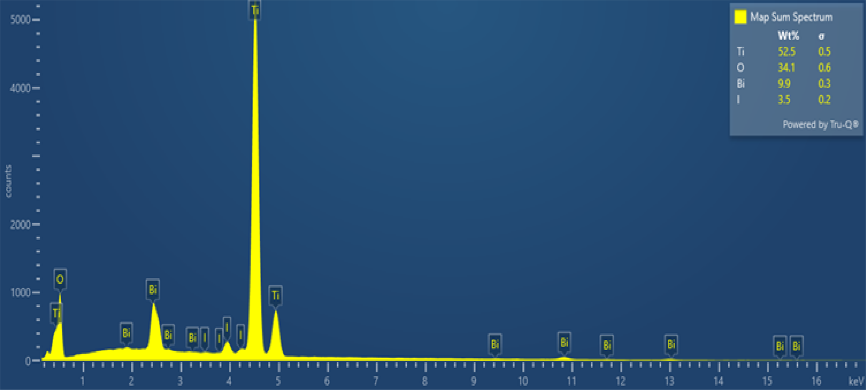


Figure S3. EDX Spectra of BiOI/TNA prepared with 5 mM of cationic precursor and 3mM of anionic precursor


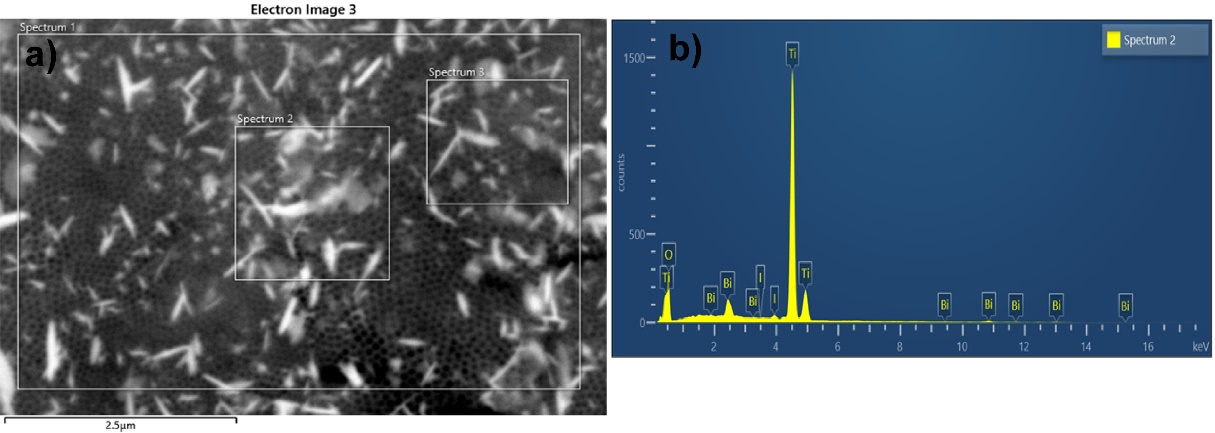


Figure S4. EDX Spectra of BiOI/TNA prepared with 1 mM of cationic and anionic precursor

Table S2. Composition of BiOI/TNAs prepared with 1 mM of cationic and anionic precursor

| **Element** | **Line Type** | **Weight %** | **Weight % Sigma** | **Atomic %** |
| --- | --- | --- | --- | --- |
| O | K series | 39.81 | 1.07 | 68.40 |
| Ti | K series | 53.20 | 0.99 | 30.53 |
| I | L series | 1.79 | 0.25 | 0.39 |
| Bi | M series | 5.19 | 0.47 | 0.68 |
| Total |  | 100.00 |  | 100.00 |
